# Supplementary material for: Effects of supplementing bile acids on the production performance, fatty acid and bile acid composition, and gut microbiota in transition dairy cows
Source: Springer Nature journal article supplement (doi:10.1186/s40104-025-01207-8), 2025-06-12

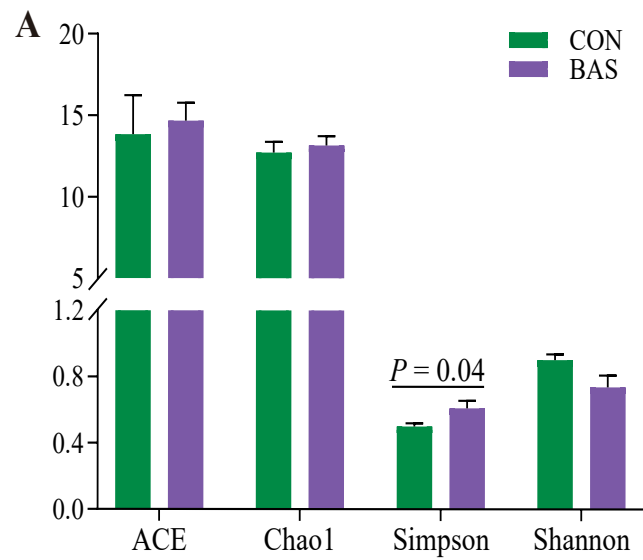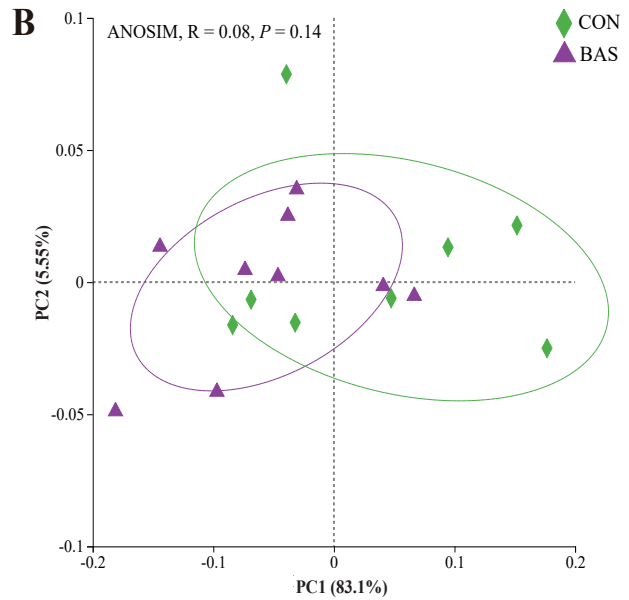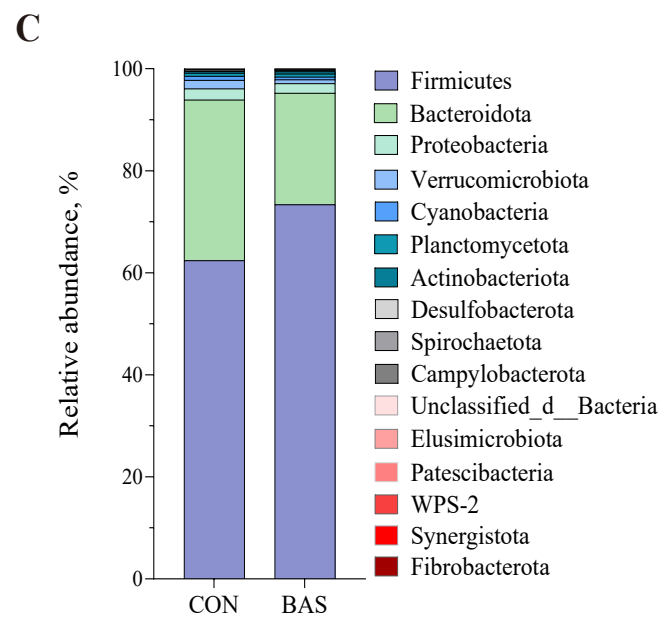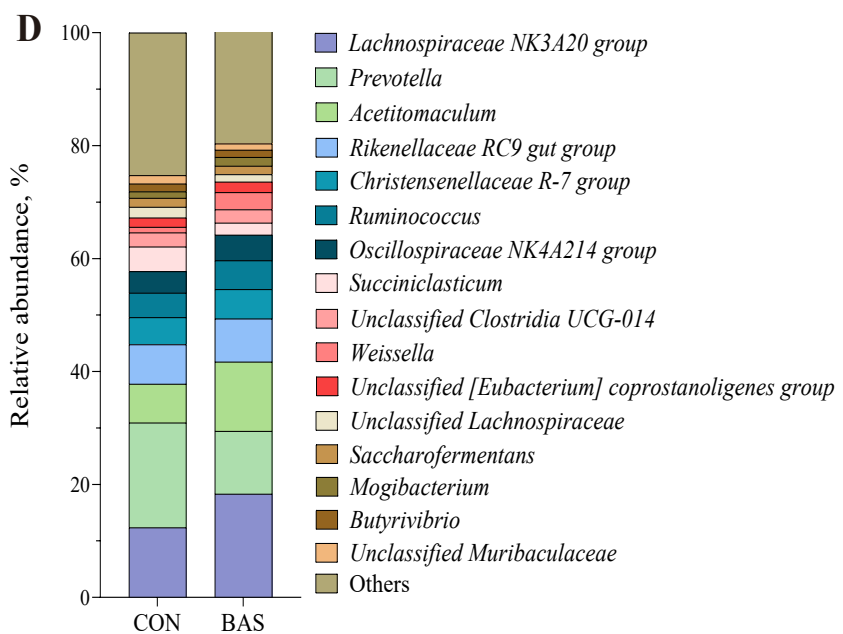

Supplement: MOESM2 [file 40104_2025_1207_MOESM2_ESM.pdf]
