# Supplementary material for: Effects of supplementing bile acids on the production performance, fatty acid and bile acid composition, and gut microbiota in transition dairy cows
Source: J Anim Sci Biotechnol. 2025 Jun 12;16:83. doi: 10.1186/s40104-025-01207-8 (PMC12160099; doi:10.1186/s40104-025-01207-8)
Supplement: Supplementary file 1 — Additional file 1: Table S1 Feed ingredients and nutrient composition of prepartum, postpartum, and lactating diets. Table S2 Effects of supplementing bile acids on rumen fermentation at d 14 postpartum in transition dairy cows. Table S3 Effects of supplementing bile acids on plasma bile acid individual and categories on d 21 postpartum in transition dairy cows. Table S4 Effects of supplementing bile acids on fecal bile acid individual and categories on d 21 postpartum in transition dairy cows. [file 40104_2025_1207_MOESM1_ESM.docx]

**Table S1** Feed ingredients and nutrient composition of prepartum, postpartum, and lactating diets

| **Ingredients** | **% of DM1** | | |
| --- | --- | --- | --- |
| **Prepartum** | **Postpartum** | **Lactating** |
| Oat hay | 3.30 | 1.00 | 1.00 |
| Alfalfa hay | 1.00 | 2.80 | 2.80 |
| Corn silage | 13.00 | 15.00 | 15.00 |
| Canola meal | 1.00 | 0.70 | 0.70 |
| Beet granules | 1.00 | 0.70 | 0.70 |
| Whole cottonseed | - | 1.30 | 1.30 |
| Steam-flaked corn | 2.10 | 2.00 | 2.00 |
| Crushed corn | 0.00 | 2.50 | 2.50 |
| Soybean meal | 1.80 | 2.60 | 2.60 |
| Extruded soybean | - | 0.60 | 0.60 |
| Premix2 | 0.70 | 0.70 | 0.70 |
| Rumen-protected glucose | 0.10 | 0.10 | 0.10 |
| Rumen-protected methionine | 0.03 | 0.03 | 0.03 |
| Chlorin soybean meal | 0.25 | 0.00 | 0.00 |
| Choline chloride | 0.03 | 0.025 | 0.025 |
| Salt | - | 0.20 | 0.20 |
| DM | 48.57 ± 0.89 | 50.01 ± 0.85 | 48.51 ± 0.63 |
| Chemical analysis, % of DM ± SD3 | | |  |
| Starch | 19.04 ± 1.21 | 21.83 ± 0.49 | 25.28 ± 0.36 |
| CP | 15.40 ± 0.13 | 18.14 ± 0.25 | 18.82 ± 0.33 |
| EE | 3.19 ± 0.12 | 4.27 ± 0.07 | 4.56 ± 0.39 |
| NDF | 39.77 ± 1.03 | 37.44 ± 2.15 | 40.52 ± 1.76 |
| ADF | 23.68 ± 0.94 | 15.57 ± 0.67 | 14.13 ± 0.29 |
| NFC4 | 32.36 ± 0.36 | 30.85 ± 0.63 | 28.41 ± 0.65 |
| Ash | 9.28 ± 0.14 | 9.30 ± 0.05 | 7.69 ± 0.10 |
| Ca | 0.59 ± 0.002 | 0.48 ± 0.01 | 0.44 ± 0.01 |
| P | 0.35 ± 0.02 | 0.39 ± 0.002 | 0.44 ± 0.01 |

1 Prepartum was fed from d 21 ± 3 before the expected calving date to calving; Postpartum was fed from calving d 0 to 21; Lactating was fed from d 22 to d 60

2 Premix contained (per kg of diet): 250,000 IU of vitamin A, 49,000 IU of vitamin D3, 2,600 IU of vitamin E, 100 mg of CU, 500 mg of Zn, 300 mg of Mn, 11 mg of I, 5mg of Se, and 9 mg of Co

3 *CP* Crude protein, *EE* Ether extract, *NDF* Neutral detergent fiber, *ADF* Acid detergent fiber, *Ca* Calcium, *P* Phosphorus. *SD* Standard deviation

4 NFC = 100% − (% NDF + % CP + % EE + % Ash)

**Table S2** Effects of supplementing bile acids on rumen fermentation at d 14 postpartum in transition dairy cows

| **Items1** | **Treatments** | | **SEM** | ***P*-value** |
| --- | --- | --- | --- | --- |
| **CON** | **BAS** |
| Rumen pH | 6.71 | 6.73 | 0.051 | 0.88 |
| Ammonia N, mg/dL | 14.67 | 15.42 | 0.904 | 0.89 |
| Total VFAs, mmol/L | 105.60 | 113.80 | 3.215 | 0.21 |
| Acetate, mmol/L | 63.54 | 70.53 | 1.983 | 0.08 |
| Propionate, mmol/L | 26.42 | 26.00 | 0.975 | 0.84 |
| Isobutyrate, mmol/L | 0.81 | 0.91 | 0.043 | 0.26 |
| Butyrate, mmol/L | 12.03 | 13.25 | 0.546 | 0.27 |
| Isovalerate, mmol/L | 1.48 | 1.65 | 0.088 | 0.34 |
| Valerate, mmol/L | 1.33 | 1.46 | 0.055 | 0.25 |

1 *TVFAs* Total volatile fatty acids. *SEM*, Standard error of means. CON (*n* = 15) and BAS (*n* = 17), without and with supplementing 20 g/d of bile acids, respectively

**Table S3** Effects of supplementing bile acids on plasma bile acid individual and categories on d 21 postpartum in transition dairy cows

| **Items1** | **Treatments** | | **SEM** | ***P*-value** |
| --- | --- | --- | --- | --- |
| **CON** | **BAS** |
| BA individual, nmol/L | | | | |
| HCA | 3.52 | 297.66 | 43.862 | < 0.01 |
| TCA | 16594.76 | 7498.30 | 2289.064 | 0.04 |
| α-MCA | 0.51 | 2.76 | 0.316 | < 0.01 |
| GHCA | 8.17 | 1267.26 | 240.435 | 0.01 |
| T-α-MCA | 19.34 | 8.12 | 2.401 | 0.01 |
| LCA | 6.51 | 13.25 | 1.391 | 0.01 |
| HDCA | 42.62 | 4468.24 | 663.130 | < 0.01 |
| UDCA | 1.51 | 7.64 | 1.000 | < 0.01 |
| MDCA | 1.47 | 108.6 | 18.306 | < 0.01 |
| ω-MCA | 0.51 | 2.37 | 0.373 | 0.02 |
| isoLCA | 0.84 | 2.18 | 0.271 | 0.01 |
| apoCA | 0.51 | 2.67 | 0.452 | 0.02 |
| βDCA | 4.49 | 10.12 | 1.340 | 0.04 |
| isoHDCA | 0.51 | 47.74 | 7.252 | < 0.01 |
| 6-ketoLCA | 0.51 | 146.39 | 22.628 | < 0.01 |
| 7-ketoLCA | 9.66 | 24.60 | 2.815 | 0.01 |
| GLCA | 108.16 | 211.17 | 24.702 | 0.04 |
| THCA | 12.68 | 430.90 | 77.224 | 0.01 |
| TDCA | 3735.35 | 1753.44 | 470.334 | 0.03 |
| GUDCA | 0.85 | 10.48 | 1.602 | < 0.01 |
| GHDCA | 15.47 | 3433.25 | 532.840 | < 0.01 |
| THDCA | 27.93 | 2097.35 | 320.679 | < 0.01 |
| BA categories % |  |  |  |  |
| FBA | 22.03 | 30.17 | 0.351 | 0.21 |
| CBA | 77.97 | 69.83 | 1.078 | 0.69 |
| PBA | 82.90 | 70.76 | 0.915 | 0.48 |
| SBA | 17.10 | 29.24 | 0.305 | 0.02 |
| FPBA | 19.59 | 20.26 | 0.267 | 0.90 |
| FSBA | 2.44 | 9.91 | 0.135 | < 0.01 |
| GPBA | 35.46 | 37.19 | 0.559 | 0.87 |
| GSBA | 8.46 | 12.28 | 0.135 | 0.12 |
| TPBA | 27.93 | 13.31 | 0.416 | 0.05 |
| TSBA | 6.09 | 7.01 | 0.092 | 0.60 |

1 *BAs* Bile acids, *HCA* Hyocholic acid, *TCA* Taurocholic acid, *α-MCA* α-Muricholic acid, *GHCA* Glycohyocholic acid, *T-α-MCA* Tauro-α-muricholic acid, *LCA* Lithocholic acid, *HDCA* Hyodeoxycholic acid, *UDCA* Ursodeoxycholic acid, *MDCA* Murideoxycholic acid, *ω-MCA* ω-Muricholic acid, *isoLCA* isoallolithocholic acid, *apoCA* apocholic acid, *βDCA* 3-Epideoxycholic acid, *isoHDCA* isohyodeoxycholic acid, *6-ketoLCA* 6-ketolithocholic acid, *7-ketoLCA* 7-ketolithocholic acid, *GLCA* glycolithocholic acid, *THCA* Taurohyocholic acid, *TDCA* Taurodeoxycholic acid, *GUDCA* Glycoursodeoxycholic acid, *GHDCA* Glycohyodeoxycholic acid, *THDCA* Taurohyodeoxycholic acid, *PBA* Primary bile acid, *SBA* Secondary bile acid, *FBA* Free bile acid, *CBA* Conjugated bile acid, *FPBA* Free primary bile acid, *FSBA* Free secondary bile acid, *GPBA* Glycine primary bile acid, *GSBA* Glycine secondary bile acid, *TPBA* Taurine primary bile acid, *TSBA* Taurine secondary bile acid. *SEM* Standard error of means. CON and BAS, without and with supplementing 20 g/d of bile acids, respectively

**Table S4** Effects of supplementing bile acids on fecal bile acid individual and categories on d 21 postpartum in transition dairy cows

| **Items1** | **Treatments** | | **SEM** | ***P*-value** |
| --- | --- | --- | --- | --- |
| **CON** | **BAS** |
| BA individual, nmol/kg | |  |  |  |
| TBA | 391324.82 | 1329823.59 | 132803.921 | < 0.01 |
| HCA | 126.87 | 7748.50 | 1343.486 | 0.01 |
| GCA | 7212.98 | 16756.15 | 1967.035 | 0.02 |
| βCA | 23.20 | 192.34 | 23.620 | < 0.01 |
| α-MCA | 18.21 | 302.02 | 38.552 | < 0.01 |
| β-MCA | 62.06 | 1131.67 | 150.246 | < 0.01 |
| GHCA | 6.27 | 663.19 | 100.382 | < 0.01 |
| GCDCA | 803.72 | 1893.07 | 212.183 | 0.01 |
| LCA | 39625.47 | 72006.16 | 5738.917 | < 0.01 |
| UCA | 194.19 | 408.94 | 32.777 | < 0.01 |
| HDCA | 2680.33 | 591046.65 | 81575.162 | < 0.01 |
| UDCA | 55.66 | 311.83 | 34.816 | < 0.01 |
| MDCA | 247.92 | 16331.64 | 2121.549 | < 0.01 |
| ω-MCA | 54.53 | 2255.09 | 298.927 | < 0.01 |
| isoLCA | 7634.45 | 12230.40 | 1022.145 | 0.02 |
| isoHDCA | 304.58 | 63783.36 | 8515.433 | < 0.01 |
| 6-ketoLCA | 410.97 | 56591.20 | 7575.077 | < 0.01 |
| 7-ketoLCA | 149.45 | 309.98 | 39.727 | 0.05 |
| GLCA | 83.36 | 213.39 | 23.093 | < 0.01 |
| THCA | 6.27 | 142.26 | 22.084 | < 0.01 |
| GHDCA | 6.27 | 1346.00 | 209.866 | < 0.01 |
| THDCA | 14.1 | 640.25 | 91.627 | < 0.01 |
| UDCA-3S | 61.65 | 293.21 | 31.800 | < 0.01 |
| BA categories % |  |  |  |  |
| FBA | 92.36 | 96.93 | 0.010 | 0.79 |
| CBA | 7.64 | 3.07 | 0.001 | 0.01 |
| PBA | 6.72 | 2.52 | 0.001 | 0.04 |
| SBA | 93.28 | 97.48 | 0.010 | 0.80 |
| FPBA | 2.27 | 1.44 | 0.000 | 0.27 |
| FSBA | 90.09 | 95.48 | 0.010 | 0.74 |
| GPBA | 0.21 | 0.19 | 0.000 | 0.76 |
| GSBA | 2.58 | 1.76 | 0.000 | 0.10 |
| TPBA | 4.13 | 0.84 | 0.001 | 0.02 |
| TSBA | 0.58 | 0.21 | 0.000 | 0.01 |

1 *BAs* Bile acids, *TBA* Total bile acid, *HCA* Hyocholic acid, *GC*A Glycocholic acid, *βCA* 3β-Cholic acid, *α-MCA* α-Muricholic acid, *β-MCA* β-Muricholic acid, *GHCA* Glycohyocholic acid, *GCDCA* Glycochenodeoxycholic acid, *LCA* Lithocholic acid, *UCA* Ursocholic acid, *HDCA* Hyodeoxycholic acid, *UDCA* Ursodeoxycholic acid, *MDCA* Murideoxycholic acid, *ω-MCA* ω-Muricholic acid, *isoLCA* isoallolithocholic acid, *isoHDCA* isohyodeoxycholic acid, *6-ketoLCA* 6-ketolithocholic acid, *7-ketoLCA* 7-ketolithocholic acid, *GLCA* Glycolithocholic acid, *THCA* Taurohyocholic acid, *GHDCA* Glycohyodeoxycholic acid, *THDCA* Taurohyodeoxycholic acid, *UDCA-3S* Ursodeoxycholic acid 3-Sulfate, *PBA* Primary bile acid, *SBA* Secondary bile acid, *FBA* Free bile acid, *CBA* Conjugated bile acid, *FPBA* Free primary bile acid, *FSBA* Free secondary bile acid, *GPBA* Glycine primary bile acid, *GSBA* Glycine secondary bile acid, *TPBA* Taurine primary bile acid, *TSBA* Taurine secondary bile acid, *SEM* Standard error of means. CON and BAS, without and with supplementing 20 g/d of bile acids, respectively
